# Supplementary material for: Additive manufacturing via protein denaturation
Source: Royal Society of Chemistry journal article supplement (doi:10.1039/d4gc02932a), 2024-01-01
Supplement: d4gc02932a1.pdf [file d4gc02932a1.pdf]

## Supporting information

### Additive Manufacturing via Protein Denaturation

Chang-Uk Lee<sup>a</sup>; Sung June Kim<sup>a</sup>; Rachel B. Dietrich<sup>b</sup>; Audrey L. Girard<sup>b</sup>; Andrew J. Boydston<sup>a,c,d\*</sup>

<sup>a</sup>Department of Chemistry, <sup>b</sup>Department of Food Science, <sup>c</sup>Department of Chemical & Biological Engineering, <sup>d</sup>Department of Materials Science & Engineering, University of Wisconsin, Madison, Wisconsin 53706, USA

**Table S1.** Results from compressive tests on cylinders of BSA with glycerol, BSA with glycerol after post-curing, and BSA after post-curing and hydration.

| Sample                                                     | Compressive modulus (MPa) | Stress at 60% strain (MPa) |
|------------------------------------------------------------|---------------------------|----------------------------|
| BSA after post-curing at 120 °C and hydration <sup>a</sup> | 62 ± 9                    | 53 ± 8                     |
| BSA with glycerol after post-curing                        | 60 ± 5                    | 39 ± 4                     |
| BSA with glycerol                                          | 23 ± 0.6                  | 12 ± 2                     |
| BSA with hydration <sup>a</sup>                            | 2.3 ± 0.4                 | 2.9 ± 0.4                  |

a. Without hydration, cylinders were too brittle for the compressive tests.

**Table S2.** Storage modulus ( $E'$ ) and  $\tan\delta$  of BSA with glycerol with or without post-curing by DMA.

|                                                         | $E'$ at 25 °C (MPa) | Peak at $\beta$ transition (°C) | Glass transition (°C) | Peak at $\tan\delta$ at glass transition | Crosslinking density ( $v_e$ , kmol/m <sup>3</sup> ) |
|---------------------------------------------------------|---------------------|---------------------------------|-----------------------|------------------------------------------|------------------------------------------------------|
| BSA with glycerol                                       | 159                 | -45                             | 80                    | 0.387                                    | 0.58                                                 |
| BSA with glycerol after post-curing                     | 131                 | -43                             | 70                    | 0.301                                    | 0.61                                                 |
| BSA without glycerol after post-curing and no hydration | 616 <sup>a</sup>    | - <sup>b</sup>                  | 123                   | 0.148                                    | 14.41                                                |

a.  $E'$  at 40 °C

b. We were not able to measure  $\beta$  transition for BSA after post-curing and no hydration since the sample became too brittle at low temperature from -80 °C.

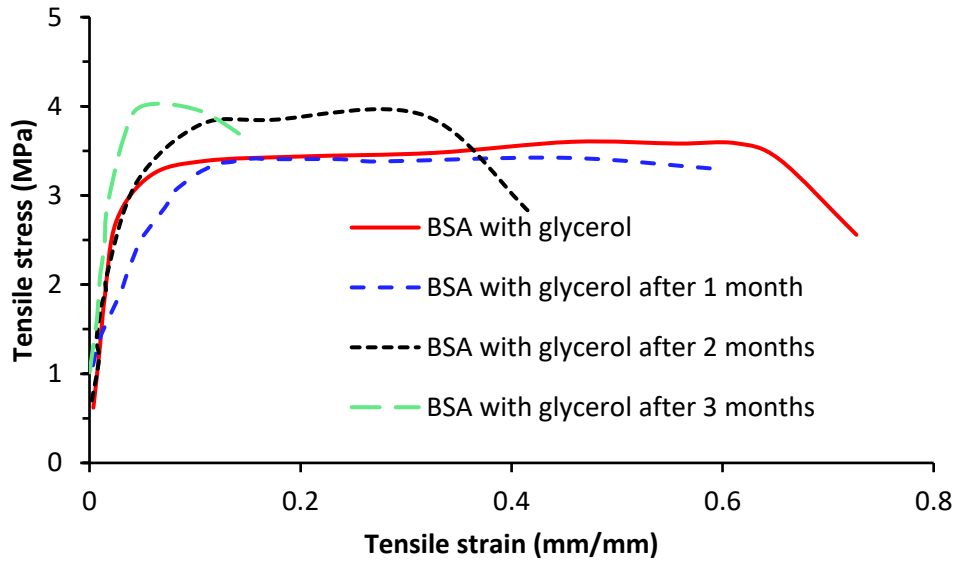

**Figure S1.** Results from tensile tests on dogbones of BSA with glycerol after aging for 2 weeks, 1 month, 2 months or 3 months under ambient conditions.

**Table S3.** Results from tensile tests on dogbones of BSA with glycerol after aging for 2 weeks, 1 month, 2 months or 3 months under ambient conditions.

|                                       | Young's modulus (MPa) | Ultimate strength (MPa) | Elongation at break (%) | Moisture content (%) |
|---------------------------------------|-----------------------|-------------------------|-------------------------|----------------------|
| BSA with glycerol (after 2 weeks)     | 79 ± 17               | 4 ± 0.3                 | 66 ± 7                  | 10 ± 0.5             |
| BSA with glycerol after 1-month aging | 41 ± 9                | 3 ± 0.4                 | 42 ± 17                 | 13 ± 1.1             |
| BSA with glycerol after 2-month aging | 101 ± 23              | 4 ± 0.4                 | 44 ± 10                 | 12 ± 0.8             |
| BSA with glycerol after 3-month aging | 140 ± 47              | 4.8 ± 1.1               | 18 ± 9                  | 13 ± 1.5             |

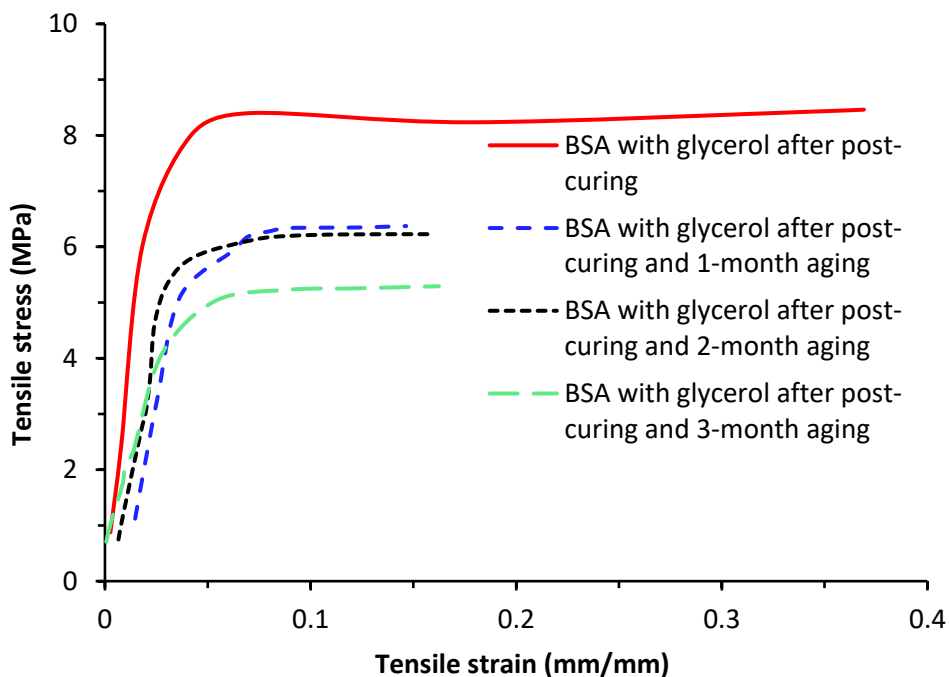

**Figure S2.** Results from tensile tests on dogbones of BSA with glycerol after post-curing and aging for 2 weeks, 1 month, 2 months or 3 months under ambient conditions.

**Table S4.** Results from tensile tests on dogbones of BSA with glycerol after post-curing and aging for 2 weeks, 1 month, 2 months or 3 months under ambient conditions.

|                                                       | Young's modulus (MPa) | Ultimate strength (MPa) | Elongation at break (%) | Moisture content (%) |
|-------------------------------------------------------|-----------------------|-------------------------|-------------------------|----------------------|
| BSA with glycerol after post-curing (2 days)          | 233 ± 9               | 8 ± 1                   | 31 ± 6                  | 8.0 ± 1.4            |
| BSA with glycerol after post-curing and 1-month aging | 180 ± 47              | 5 ± 1                   | 14 ± 2                  | 11.0 ± 0.1           |
| BSA with glycerol after post-curing and 2-month aging | 187 ± 39              | 6 ± 0.3                 | 12 ± 3                  | 11.4 ± 0.4           |
| BSA with glycerol after post-curing and 3-month aging | 131 ± 14              | 5 ± 0.2                 | 20 ± 9                  | 13.4 ± 0.8           |

**Table S5.** Degradation profiles of printed BSA cylinders without or after post-curing at 120 C.

|                               | Mass (%) after 5 days | Mass (%) after 10 days | Mass (%) after 13 days | Mass (%) after 17 days |
|-------------------------------|-----------------------|------------------------|------------------------|------------------------|
| Cylinders without post-curing | 64.5 ± 13.3           | 12.0 ± 8.7             | 0                      | -                      |
| Cylinders after post-curing   | 71.4 ± 5.0            | 33.1 ± 6.7             | -                      | 0                      |

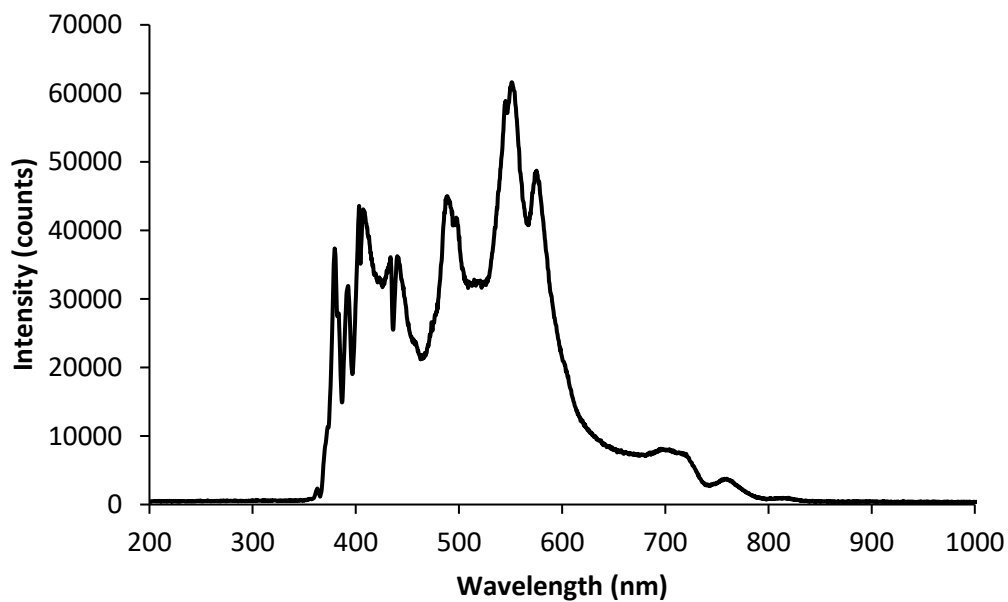

**Figure S3.** Emission spectrum of the DLP projector for HAPPI.
